# Supplementary material for: Interaction of Vinyl-Type Carbocations, C3H5+ and C4H7+ with Molecules of Water, Alcohols, and Acetone
Source: MDPI journal article supplement (doi:10.3390/molecules28031146), 2023-01-23
Supplement: s1 [file s1]

Supplementary Materials

# Interaction of Vinyl-Type Carbocations, $C_3H_5^+$ and $C_4H_7^+$ with Molecules of Water, Alcohols, and Acetone

Evgenii S. Stoyanov \*, Irina Yu Bagryanskaya and Irina V. Stoyanova

N.N. Vorozhtsov Institute of Organic Chemistry, Siberian Branch of Russian Academy of Sciences, 630090 Novosibirsk, Russia

\* Correspondence: evgenii@nioch.nsc.ru

## IR spectral and X-ray structural data

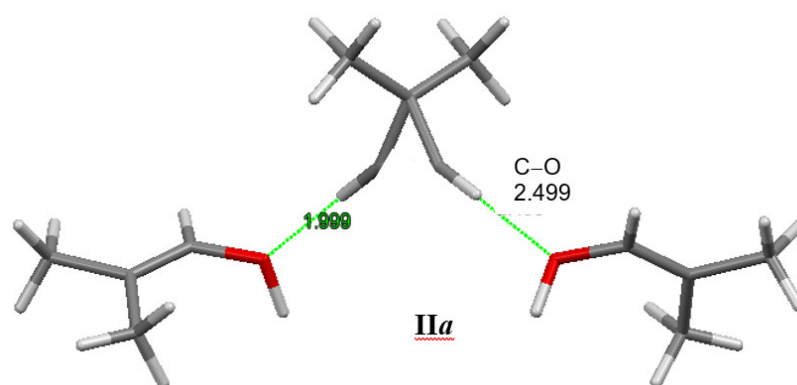

**Figure S1.** Two locations of the  $C_4H_7^+ \cdot C_4H_7OH$  adduct in the crystal lattice of its salt with the  $\{Cl_{11}^-\}$  anion (not shown). The structure of protonated ether  $C_4H_7-O^+(H) -C_4H_8Cl$  (as a salt of the  $\{Cl_{11}^-\}$  anion) was determined by X-ray diffraction analysis; the  $C=C$  bond length in the  $(H_3C)_2C=C^+(H)$  molecular fragment is 1.278 Å, and the frequency of the  $C=C$  stretching vibration is  $1706\text{ cm}^{-1}$ . These data are available upon request. The structure will be deposited later and published with all related information (manuscript in preparation).

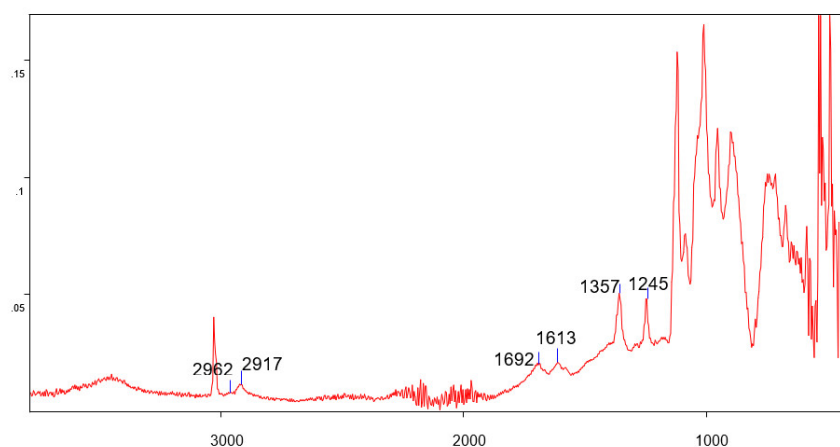

**Figure S2.** The ATR IR spectrum of proton disolvate IVa.

**Table 1.** Crystallographic data and details of the X-ray diffraction experiment.

| Compound                                    | Salt of cation I                                                                    | Salt of cation IIa                                                     | Salt of cation III*                                                                 |
|---------------------------------------------|-------------------------------------------------------------------------------------|------------------------------------------------------------------------|-------------------------------------------------------------------------------------|
| Empirical formula                           | C <sub>8</sub> H <sub>17</sub> O <sub>2</sub> + B <sub>11</sub> Cl <sub>11</sub> CH | C <sub>8</sub> H <sub>15</sub> O + B <sub>11</sub> Cl <sub>11</sub> CH | C <sub>6</sub> H <sub>13</sub> O <sub>2</sub> + B <sub>11</sub> Cl <sub>11</sub> CH |
| Formula weight                              | 667.09 (663.9)                                                                      | 649.12                                                                 | 639.04                                                                              |
| Temperature K                               | 200(2)                                                                              | 200(2)                                                                 | 200(2)                                                                              |
| Wavelength Å                                | 0.71073                                                                             | 0.71073                                                                | 0.71073                                                                             |
| Crystal system                              | Monoclinic                                                                          | Monoclinic                                                             | Monoclinic                                                                          |
| Space group                                 | P2 <sub>1</sub> /n                                                                  | C2/c                                                                   | P2 <sub>1</sub> /n                                                                  |
| Unit cell dimensions <i>a</i> Å             | 10.8543(3)                                                                          | 34.904(3)                                                              | 9.2079(5)                                                                           |
| <i>b</i> Å                                  | 43.4962(11)                                                                         | 10.2295(9)                                                             | 18.1850(11)                                                                         |
| <i>c</i> Å                                  | 12.8025(3)                                                                          | 18.1986(16)                                                            | 15.6536(10)                                                                         |
| <i>α</i> °                                  | 90                                                                                  | 90                                                                     | 90                                                                                  |
| <i>β</i> °                                  | 113.9110(10)                                                                        | 120.156(5)                                                             | 93.992(2)                                                                           |
| <i>γ</i> °                                  | 90                                                                                  | 90                                                                     | 90                                                                                  |
| Volume Å <sup>3</sup>                       | 5525.6(2)                                                                           | 5618.5(9)                                                              | 2614.8(3)                                                                           |
| <i>Z</i>                                    | 8                                                                                   | 8                                                                      | 4                                                                                   |
| Density (calcd.) Mg.m <sup>-3</sup>         | 1.604                                                                               | 1.485                                                                  | 1.623                                                                               |
| Abs. coefficient mm <sup>-1</sup>           | 1.116                                                                               | 1.090                                                                  | 1.176                                                                               |
| F(000)                                      | 2640                                                                                | 2464                                                                   | 1256                                                                                |
| Crystal size mm <sup>3</sup>                | 0.04 x 0.15 x 0.40                                                                  | 0.01 x 0.30 x 0.40                                                     | 0.04 x 0.15 x 0.90                                                                  |
| Θ range for data collection °               | 0.9 – 25.0                                                                          | 2.1 - 25.1                                                             | 2.2 – 30.0                                                                          |
| Index ranges                                | -12 ≤ <i>h</i> ≤ 12, -51 ≤ <i>k</i> ≤ 51, -15 ≤ <i>l</i> ≤ 15                       | -41 ≤ <i>h</i> ≤ 41, -12 ≤ <i>k</i> ≤ 12, -21 ≤ <i>l</i> ≤ 21          | -13 ≤ <i>h</i> ≤ 10, -25 ≤ <i>k</i> ≤ 25, -22 ≤ <i>l</i> ≤ 21                       |
| Reflections collected                       | 74208                                                                               | 46221                                                                  | 44516                                                                               |
| Independent reflections                     | 9746 R(int) = 0.066                                                                 | 4992 R(int) = 0.095                                                    | 7137 R(int) = 0.042                                                                 |
| Completeness to θ %                         | 99.9                                                                                | 99.3                                                                   | 99.9 (θ ≤ 50°)                                                                      |
| Data / restraints / parameters              | 9746 / 4 / 616                                                                      | 4992 / 0 / 283                                                         | 7137/ 0 / 291                                                                       |
| Goodness-of-fit on <i>F</i> <sup>2</sup>    | 1.08                                                                                | 1.02                                                                   | 1.08                                                                                |
| Final R indices <i>I</i> > 2σ( <i>I</i> )   | R <sub>1</sub> =0.0459, wR <sub>2</sub> =0.1135                                     | R <sub>1</sub> =0.0486, wR <sub>2</sub> =0.1102                        | R <sub>1</sub> =0.0366, wR <sub>2</sub> =0.0876                                     |
| Final R indices (all data)                  | R <sub>1</sub> =0.0577, wR <sub>2</sub> =0.1207                                     | R <sub>1</sub> =0.0898, wR <sub>2</sub> =0.1298                        | R <sub>1</sub> =0.0569, wR <sub>2</sub> =0.1066                                     |
| Largest diff. peak / hole e.Å <sup>-3</sup> | 0.72/ -0.59                                                                         | 0.80 / -0.70                                                           | 0.82/ -0.35                                                                         |
| CCDC                                        |                                                                                     |                                                                        |                                                                                     |
| Compound                                    | Salt of cation IVa                                                                  |                                                                        | Salt of cation IVb                                                                  |
| Empirical formula                           | C <sub>6</sub> H <sub>13</sub> O <sub>2</sub> + B <sub>11</sub> Cl <sub>11</sub> CH |                                                                        | C <sub>3</sub> H <sub>7</sub> O + B <sub>11</sub> Cl <sub>11</sub> CH               |
| Formula weight                              | 638.03                                                                              |                                                                        | 580.96                                                                              |
| Temperature K                               | 200(2)                                                                              |                                                                        | 200(2)                                                                              |
| Wavelength Å                                | 0.71073                                                                             |                                                                        | 0.71073                                                                             |
| Crystal system                              | Triclinic                                                                           |                                                                        | Monoclinic                                                                          |
| Space group                                 | P-1                                                                                 |                                                                        | P2 <sub>1</sub> /c                                                                  |
| Unit cell dimensions <i>a</i> Å             | 9.2804(10)                                                                          |                                                                        | 10.330(3)                                                                           |
| <i>b</i> Å                                  | 11.6046(11)                                                                         |                                                                        | 13.184(3)                                                                           |
| <i>c</i> Å                                  | 13.6551(15)                                                                         |                                                                        | 17.286(5)                                                                           |
| <i>α</i> °                                  | 90.505(4)                                                                           |                                                                        | 90                                                                                  |
| <i>β</i> °                                  | 108.338(4)                                                                          |                                                                        | 92.933(9)                                                                           |
| <i>γ</i> °                                  | 109.796(4)                                                                          |                                                                        | 90                                                                                  |
| Volume Å <sup>3</sup>                       | 1302.4(2)                                                                           |                                                                        | 2351.1(11)                                                                          |
| <i>Z</i>                                    | 2                                                                                   |                                                                        | 4                                                                                   |
| Density (calcd.) Mg.m <sup>-3</sup>         | 1.627                                                                               |                                                                        | 1.641                                                                               |
| Abs. coefficient mm <sup>-1</sup>           | 1.180                                                                               |                                                                        | 1.295                                                                               |
| F(000)                                      | 626                                                                                 |                                                                        | 1128                                                                                |

|                                             |                                                                   |                                                                   |
|---------------------------------------------|-------------------------------------------------------------------|-------------------------------------------------------------------|
| Crystal size mm <sup>3</sup>                | 0.10 x 0.20 x 0.20                                                | 0.08 x 0.10 x 0.55                                                |
| $\Theta$ range for data collection °        | 1.6 – 27.6                                                        | 1.9 – 25.0                                                        |
| Index ranges                                | $-12 \leq h \leq 12, -15 \leq k \leq 14,$<br>$-17 \leq l \leq 16$ | $-12 \leq h \leq 12, -15 \leq k \leq 15,$<br>$-20 \leq l \leq 20$ |
| Reflections collected                       | 26608                                                             | 30701                                                             |
| Independent reflections                     | 5819 R(int) = 0.045                                               | 4158 R(int) = 0.149                                               |
| Completeness to $\theta$ %                  | 99.6                                                              | 99.9                                                              |
| Data / restraints / parameters              | 5819 / 0 / 287                                                    | 4158 / 186 / 282                                                  |
| Goodness-of-fit on $F^2$                    | 1.02                                                              | 1.01                                                              |
| Final R indices $I > 2\sigma(I)$            | $R_1=0.0542, wR_2=0.1406$                                         | $R_1 = 0.1997, wR_2 =$<br>0.4534                                  |
| Final R indices (all data)                  | $R_1=0.0839, wR_2=0.1627$                                         | $R_1 = 0.2482, wR_2 =$<br>0.4765                                  |
| Largest diff. peak / hole e.Å <sup>-3</sup> | 0.97 / -0.51                                                      | 2.47 / -1.03                                                      |
| CCDC                                        |                                                                   |                                                                   |

---

\* The reason for the poor R-factor is probably the disorder of the anion, which could not be localized.
